# Supplementary material for: Wavenumber selection based analysis in Raman spectroscopy improves skin cancer diagnostic specificity
Source: Royal Society of Chemistry journal article supplement (doi:10.1039/c5an02073e), 2016-01-01
Supplement: c5an02073e1.pdf [file c5an02073e1.pdf]

## Electronic Supplementary Information

### **Wavenumber selection based analysis in Raman spectroscopy improves skin cancer diagnostic specificity**

Jianhua Zhao,<sup>1,2</sup> Haishan Zeng,<sup>1,2</sup> Sunil Kalia<sup>1</sup> and Harvey Lui<sup>1,2</sup>

<sup>1</sup>Photomedicine Institute, Department of Dermatology and Skin Science, University of British Columbia and Vancouver Coastal Health Research Institute, Vancouver, Canada

<sup>2</sup>Imaging Unit - Integrative Oncology Department, BC Cancer Agency Research Center, Vancouver, Canada

#### **Corresponding author**

Haishan Zeng

Professor

Integrative Oncology Department – Imaging Unit

BC Cancer Agency Research Center

675 West 10<sup>th</sup> Ave

Vancouver, BC V5Z 1L3

Phone: (604)-675-8083

Email: hzeng@bccrc.ca

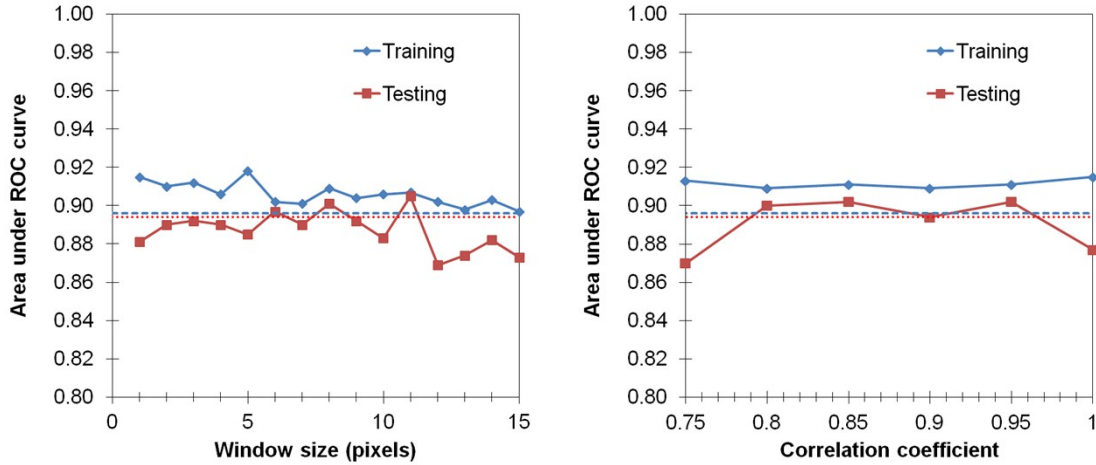

**Figure S1.** Diagnostic performance of wavenumber selection based on stepwise regression with fixed window sizes (a) and varying window sizes (b). The dashed lines and dotted lines are the results of the training dataset and test dataset without wavenumber selection. It could be seen that the diagnostic performance of the training dataset were all improved using either fixed window sizes or varying window sizes. However, the improvement for the test dataset varies heavily for fixed window sizes, and is more consistent for varying window sizes.
